# Supplementary material for: Organic–inorganic interactions revealed by Raman spectroscopy during reversible phase transitions in semiconducting [(C2H5)4N]FeCl4
Source: Royal Society of Chemistry journal article supplement (doi:10.1039/d1ra02475b), 2021-01-01
Supplement: d1ra02475b1.pdf [file d1ra02475b1.pdf]

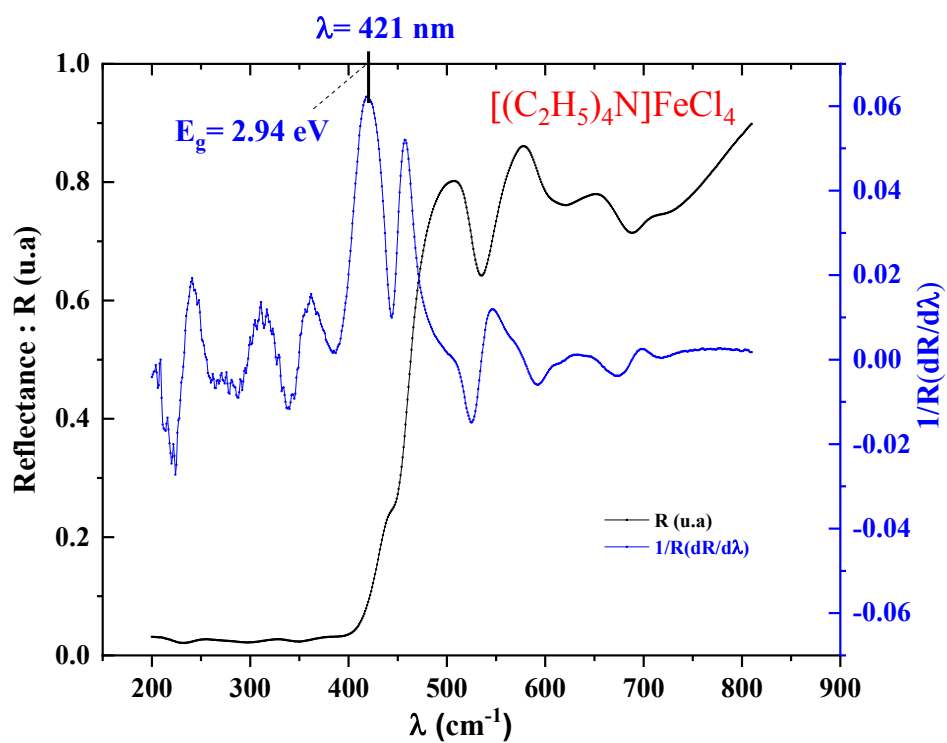

**Fig. S1:**  $1/R(dR/d\lambda)$  versus  $\lambda$  of  $[(\text{C}_2\text{H}_5)_4\text{N}]\text{FeCl}_4$  powder.

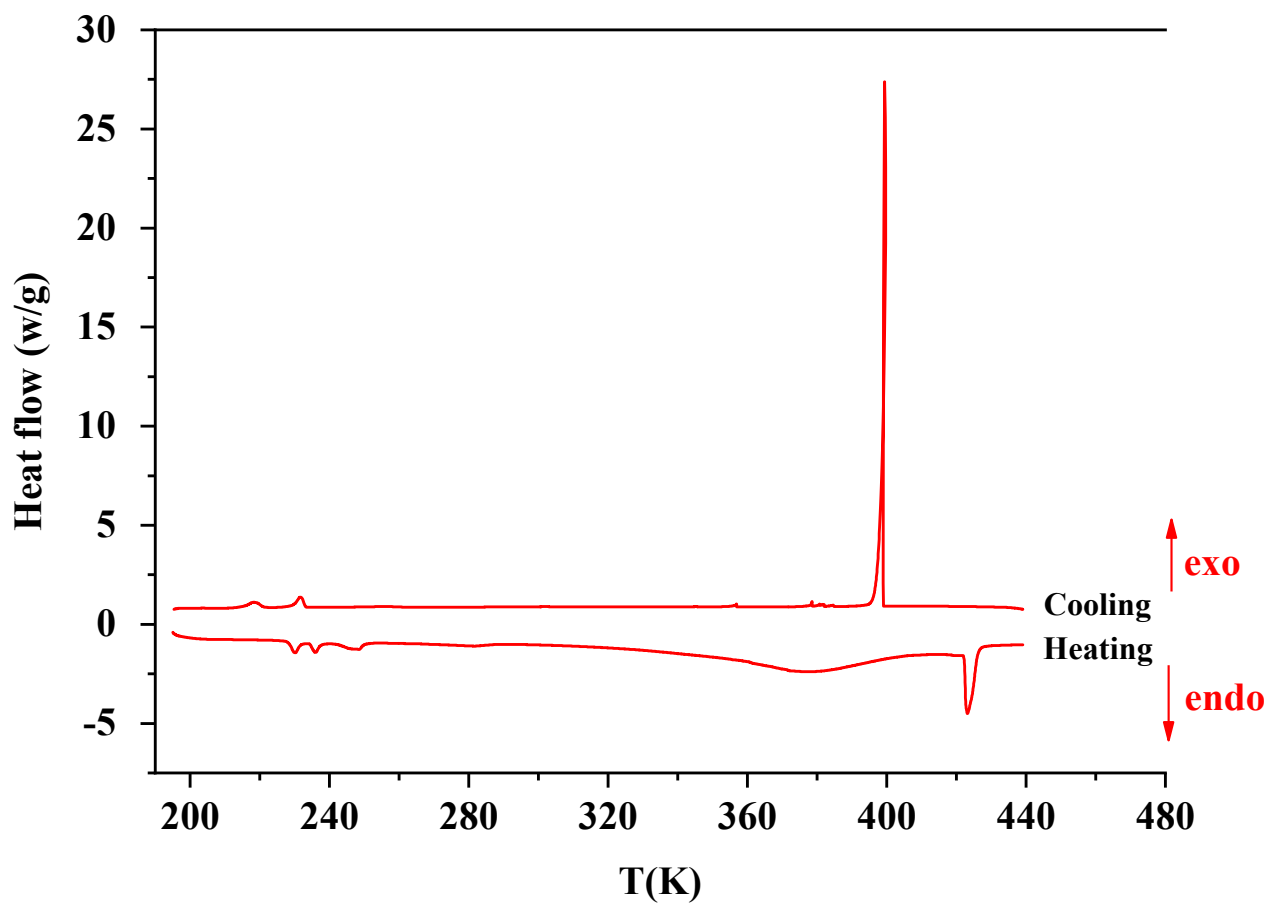

**Fig. S2:** First heating/cooling run between 193 and 443 K of the  $[(C_2H_5)_4N]FeCl_4$  compound.

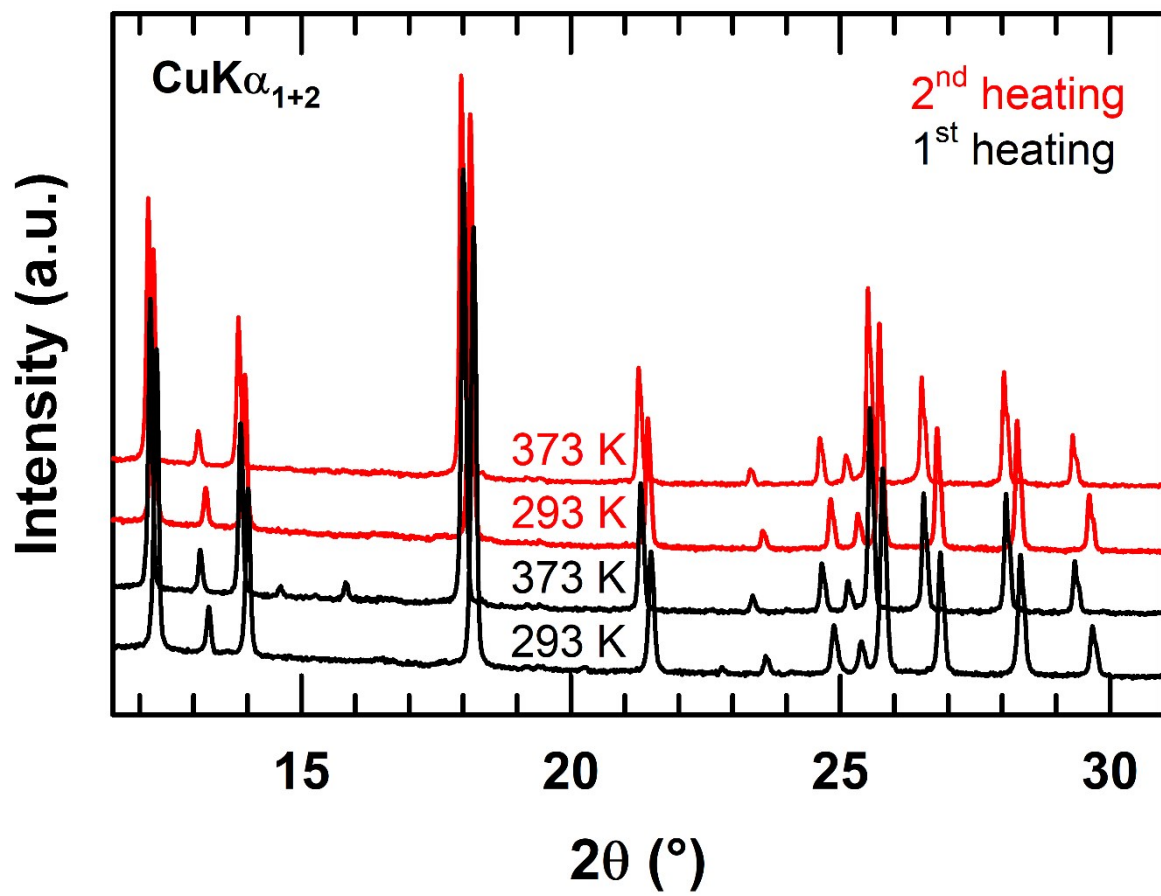

Fig. S3: X-ray powder diffraction at 293 and 373 K during two heating and cooling runs.

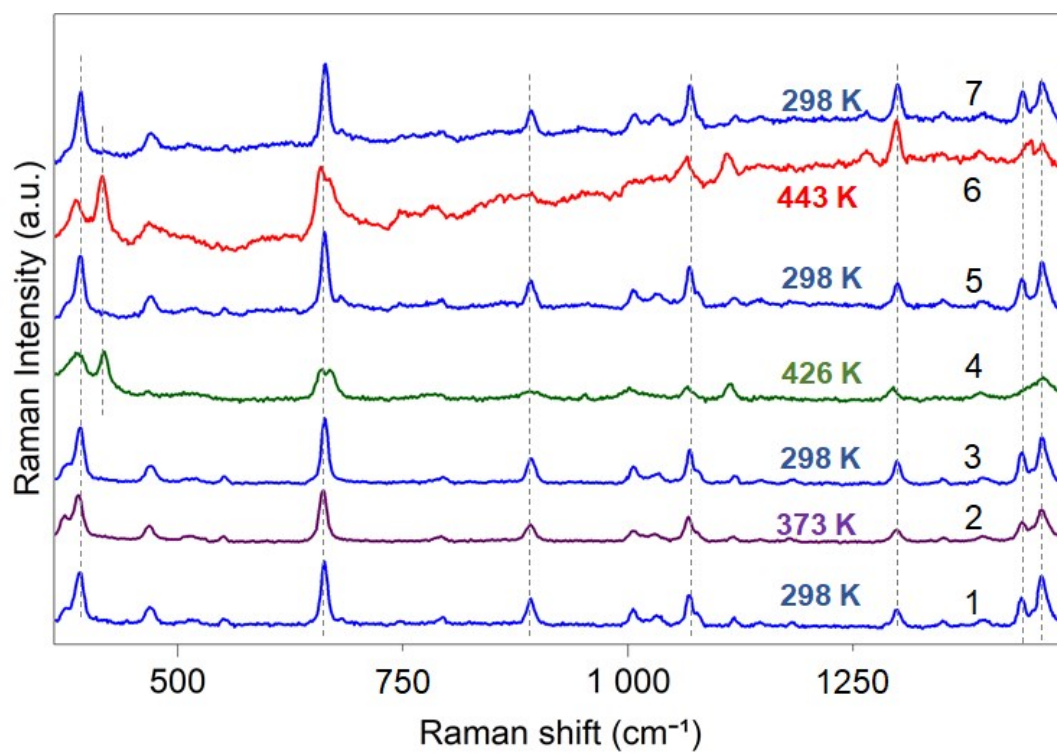

**Fig. S5:** Raman spectra before and after heating to 373, 426 and 443 K of  $[(C_2H_5)_4N]FeCl_4$  compound.
